1 **ABSTRACT**

2 **Introduction:** Patients with alcoholic hepatitis have an increase in cytolysin-producing  
3 *Enterococcus faecalis* that correlates with disease severity and mortality.

4 **Aim:** To determine whether patients with chronic alcoholic pancreatitis have an elevated  
5 abundance of cytolysin-producing *E. faecalis*.

6 **Methods:** Quantification by qPCR of cytolysin-producing *E. faecalis* in controls and patients  
7 with alcoholic hepatitis or pancreatitis.

8 **Results:** Patients with alcoholic pancreatitis had a higher proportion of intestinal cytolysin-  
9 positive *E. faecalis* than healthy controls and patients with alcoholic hepatitis.

10 **Conclusion:** Cytolytic *E. faecalis* may also be involved in this other alcohol-related  
11 complication and benefit from targeted microbiota editing strategies.

12

## 1 INTRODUCTION

2 Chronic, excessive alcohol consumption leads to several diseases, including alcoholic  
3 hepatitis (AH) and chronic alcoholic pancreatitis (CAP). These diseases are life-threatening  
4 complications of chronic alcohol consumption, with a high rate of mortality, and they have no  
5 specific treatment, except alcohol withdrawal. Several studies have shown that the intestinal  
6 microbiota plays a role in the pathogenesis of these two diseases and that patients with CAP  
7 or AH display altered and specific gut dysbiosis (1,2). Among the differences observed in the  
8 intestinal microbiota, we previously reported a higher relative abundance of *Enterococcus* in  
9 patients with CAP (2).

10 A recent study by Duan et al. found that patients with AH have an elevated relative  
11 abundance of a particular type of fecal *Enterococcus faecalis* that produces a bacteriocin,  
12 cytolysin, which causes hepatocyte death. This bacteria is associated with more severe clinical  
13 outcomes and increase mortality in these patients (3). However, it was not clear in this study  
14 whether the alcoholic patients with alcoholic hepatitis that were included had any other  
15 alcohol-related complications. This could be of major interest, as the microbiome-editing  
16 strategy proposed by the authors could also be extended to other alcohol-induced  
17 complications if the relative abundance of this strain of *Enterococcus faecalis* is also elevated  
18 in such complications. We thus aimed to determine whether patients with chronic alcoholic  
19 pancreatitis also exhibit an elevated relative abundance of cytolysin-producing *Enterococcus*  
20 *faecalis* and compare their profile to that of patients with alcoholic hepatitis.

21

## 22 METHODS

23 Three groups of patients were included in the study: healthy controls (HC) (n = 28), patients  
24 with AH and without CAP or acute pancreatitis (n = 27) and patients with CAP and without  
25 AH (n = 24). Fecal samples were frozen at -80°C and bacterial DNA was extracted as  
26 previously described (4). We amplified three bacterial genes: total bacterial 16S, *E. faecalis*  
27 16S, and *E. faecalis* cytolysin L (*cytLL*) (see Supplementary Material for details).

28

## 29 RESULTS

30 The patient characteristics are summarized in Table 1. We included patients with  
31 chronic alcohol consumption and two types of alcohol-related complications, AH without  
32 CAP and CAP without AH. Patients with CAP had a significantly higher abundance of fecal  
33 *E. faecalis* than healthy controls (HC) ( $p < 0.0001$ ) and AH patients ( $p = 0.0004$ ) (Figure 1A).

1 There was no difference in the relative abundance of *E. faecalis* between AH patients and HC  
2 (Figure 1A). Genomic DNA of *E. faecalis* was detected in 96% (23/24) of CAP patients, 89%  
3 (25/28) of HC ( $p > 0.05$ ), and 85% (23/27) of AH patients ( $p > 0.05$ ) (Figure 1B). CAP  
4 patients were more frequently cytolysin-positive (23/24, 96%) than HC (11/28, 39%,  $p <$   
5  $0.001$ ) or AH patients (13/27, 48%,  $p < 0.001$ , Figure 1C). In addition, the relative abundance  
6 of cytolysin-positive *E. faecalis* was elevated in CAP and AH patients ( $p = 0.0006$  and  $p =$   
7  $0.0067$ ) but not HC (Figure 1D). The relative abundance of cytolysin-positive *E. faecalis* did  
8 not correlate with pancreatic disease severity, neither in terms of biological (inflammation and  
9 albumin levels) nor radiological (necrosis and inflammation) severity criteria.

10

## 11 **DISCUSSION**

12 Overall, our data show that the relative abundance of cytolysin-positive *E. faecalis* is  
13 elevated in two different alcohol-related complications i.e. AH and CAP. Therefore, an  
14 increase in the relative abundance of cytolysin-positive *E. faecalis* is due to alcohol-  
15 consumption itself rather than to a specific complication. Toxicity of cytolytic *E. faecalis*  
16 against a human intestinal epithelial cell line has been shown (5) suggesting that it acts  
17 directly against the intestinal barrier. Moreover, studies in mice have shown that gut dysbiosis  
18 is involved in the pathogenesis of pancreatitis by inducing alterations in intestinal barrier  
19 function (6). Cytolysin levels increased significantly in the livers of mice given cytolytic *E.*  
20 *faecalis*, suggesting a direct toxic effect of cytolysin in the liver (3). Therefore, as alcohol  
21 itself increases gut permeability, the alcohol-related increase in cytolysin-positive *E. faecalis*  
22 in CAP may also be involved in the inflammatory process that leads to CAP. Accordingly,  
23 *Enterococcus* is the most common bacteria found in the bile of patients with CAP and  
24 antibodies against *E. faecalis* capsular polysaccharide are elevated in the blood of these  
25 patients (7). We therefore suggest that targeting cytolysin-positive *E. faecalis* using the  
26 bacteriophages described by Duan et al. could also be of great interest for CAP patients.

27 In summary, we confirm, in our independent French cohort, that patients with AH and  
28 no pancreatic complications have an elevated prevalence of cytolysin-positive *E. faecalis* and  
29 show that the prevalence of cytolysin-positive *E. faecalis* is also elevated in another alcohol-  
30 related complication, CAP without alcoholic AH. This could be of great interest in battling  
31 this life-threatening complication, which has no specific treatment and which could benefit  
32 from the microbiota-editing strategy using targeted bacteriophages described by Duan et al  
33 (3). Further studies are needed to confirm the role of cytolysin-positive *E. faecalis* in CAP and  
34 consider it as a therapeutic target in patients.

1 **Guarantors of the article:** Dragos Ciocan, MD, PhD and Anne-Marie Cassard, PhD.

2 **Specific author contributions:** CP: experimental design, acquisition, analysis, and  
3 interpretation of data, and drafting of the manuscript. VR, CSV, DC, GP: patients'  
4 recruitment. NT: technical support. GP, VR, AMC, DC: funding. AMC: data analysis and  
5 interpretation, drafting of the manuscript. DC: study concept, data analysis and interpretation,  
6 drafting of the manuscript. All authors have reviewed and approved the final draft of the  
7 manuscript.

8 **Acknowledgments.** The authors thank the Plaimmo Platform, P. Serror (MICALIS,  
9 UMT1319 INRA-AgroParisTech) for the generous gift of the *E. faecalis* DNA strain and C  
10 Hugot for technical support.

11 **Financial support:** This work was supported by INSERM, Université Paris-Sud, the  
12 "Fondation pour la Recherche Médicale" (FRM), the National French Society of  
13 Gastroenterology (SNFGE), the "Association Française pour l'Etude du Foie" (AFEF), and the  
14 "Groupement Transversal INSERM sur le Microbiote" (GPT microbiota).

15 **Potential competing interests:** The authors declare to have no competing financial interests  
16 for the present work.

## 17 REFERENCES

- 18 1. Jandhyala SM, Madhulika A, Deepika G, Rao GV, Reddy DN, Subramanyam C, et al.  
19 Altered intestinal microbiota in patients with chronic pancreatitis: implications in diabetes  
20 and metabolic abnormalities. *Sci Rep.* 2017 Mar 3;7:43640.
- 21 2. Ciocan D, Rebours V, Voican CS, Wrzosek L, Puchois V, Cassard A-M, et al.  
22 Characterization of intestinal microbiota in alcoholic patients with and without alcoholic  
23 hepatitis or chronic alcoholic pancreatitis. *Sci Rep.* 2018 Mar 19;8(1):4822.
- 24 3. Duan Y, Llorente C, Lang S, Brandl K, Chu H, Jiang L, et al. Bacteriophage targeting of  
25 gut bacterium attenuates alcoholic liver disease. *Nature.* 2019;575(7783):505–11.
- 26 4. Ciocan D, Voican CS, Wrzosek L, Hugot C, Rainteau D, Humbert L, et al. Bile acid  
27 homeostasis and intestinal dysbiosis in alcoholic hepatitis. *Aliment Pharmacol Ther.* 2018  
28 Nov;48(9):961–74.
- 29 5. Cox CR, Coburn PS, Gilmore MS. Enterococcal cytolysin: a novel two component  
30 peptide system that serves as a bacterial defense against eukaryotic and prokaryotic cells.  
31 *Curr Protein Pept Sci.* 2005 Feb;6(1):77–84.

- 1 6. Chen J, Huang C, Wang J, Zhou H, Lu Y, Lou L, et al. Dysbiosis of intestinal microbiota  
2 and decrease in paneth cell antimicrobial peptide level during acute necrotizing  
3 pancreatitis in rats. PloS One. 2017;12(4):e0176583.
- 4 7. Maekawa T, Fukaya R, Takamatsu S, Itoyama S, Fukuoka T, Yamada M, et al. Possible  
5 involvement of Enterococcus infection in the pathogenesis of chronic pancreatitis and  
6 cancer. Biochem Biophys Res Commun. 2018 Dec 2;506(4):962–9.
- 7

1 **Table 1. Clinical characteristics of the three groups of patients.**

|                                         | Chronic alcoholic pancreatitis (CAP, n = 24) | Severe alcoholic hepatitis (AH, n = 27) | Healthy controls (HC, n = 28) |
|-----------------------------------------|----------------------------------------------|-----------------------------------------|-------------------------------|
| Age (years)***                          | 51.4 ± 9.8                                   | 52.5 ± 11.5                             | 34.9 ± 11.6                   |
| Sex (male/female)***                    | 21/3                                         | 23/4                                    | 12/16                         |
| BMI (kg/m <sup>2</sup> )*               | 22.3 ± 3.3                                   | 26 ± 5.2                                | 23 ± 3.6                      |
| Alcohol intake (g/day) *                | 143.8 ± 90                                   | 106 ± 65.5                              |                               |
| Duration of intake (years)**            | 13 ± 3.9                                     | 21 ± 10.8                               |                               |
| Smoking (%)                             | 22 (92)                                      | 17 (65)                                 |                               |
| Type 2 diabetes (%) **                  | 10 (42)                                      | 2 (8)                                   |                               |
| PPI use (%)                             | 10 (45)                                      | 8 (30)                                  |                               |
| CRP (mg/L)*                             | 37.4 ± 72..1                                 | 31.88 ± 25..3                           |                               |
| AST (U/L)***                            | 38 ± 34..3                                   | 242 ± 495..7                            |                               |
| ALT (U/L)                               | 43.9 ± 43..9                                 | 66.4 ± 88..4                            |                               |
| Total bilirubin (µmol/L)***             | 25 ± 68                                      | 210.5 ± 172                             |                               |
| GGT (U/L)***                            | 182..9 ± 287..9                              | 392.8 ± 314..5                          |                               |
| Glycaemia (mmol/L)***                   | 7.3 ± 1.9                                    | 5.4 ± 1                                 |                               |
| Serum albumin (mg/dL)                   | 31 ± 7.8                                     | 26.9 ± 4,8                              |                               |
| Platelets (x10 <sup>9</sup> /L)***      | 325 ± 129                                    | 109 ± 88                                |                               |
| Prothrombin time (%)***                 | 94 ± 13.9                                    | 39 ± 13.5                               |                               |
| Cirrhosis (%)***                        | 0                                            | 27 (100)                                |                               |
| Liver biopsy (%)***                     | 0                                            | 27 (100)                                |                               |
| Maddrey score                           |                                              | 55.9 ± 21.3                             |                               |
| MELD score                              |                                              | 21.5 ± 6.5                              |                               |
| Exocrine pancreatic insufficiency (%)** | 6 (25)                                       | 0                                       |                               |

Data is expressed as the mean ± SD for continuous variables and n (%) for discrete variables. PPI: proton pump inhibitors, CRP: C-reactive protein, AST: aspartate transaminase, ALT: alanine transaminase, GGT: gamma-glutamyl transpeptidase, MELD: Model for End-Stage Liver Disease. \*p<0.05, \*\*p<0.01, \*\*\* p<0.001

2  
3

1 **FIGURE LEGENDS**

2 **Figure 1. Fecal samples from CAP patients contain more *E. faecalis* and cytolysin than**  
3 **those of AH patients and HC.** CAP: chronic alcoholic pancreatitis, AH: severe alcoholic  
4 hepatitis, HC: healthy controls. **(a)** Fold change of *E. faecalis* relative abundance in fecal  
5 samples from HC (n = 28) and AH (n = 27), and CAP patients (n = 24), assessed by qPCR.  
6 **(b)** Percentage of fecal samples positive for *E. faecalis* in HC (n = 28) and AH (n = 27) and  
7 CAP patients (n = 24), assessed by qPCR. **(c)** Percentage of cytolysin positive fecal samples  
8 in HC (n = 28) and AH (n = 27) and CAP patients (n=24), assessed by qPCR. **(d)** Relative  
9 abundance of *E. faecalis* in fecal samples from AH and CAP patients and HC whose fecal  
10 samples were cytolysin-positive or cytolysin-negative, assessed by qPCR. Data are shown as  
11 the mean  $\pm$  SEM. Significant results for \*p < 0.05, \*\*p < 0.01, and \*\*\*p < 0.001 were  
12 determined by Mann-Whitney tests, unless stated otherwise.



**A**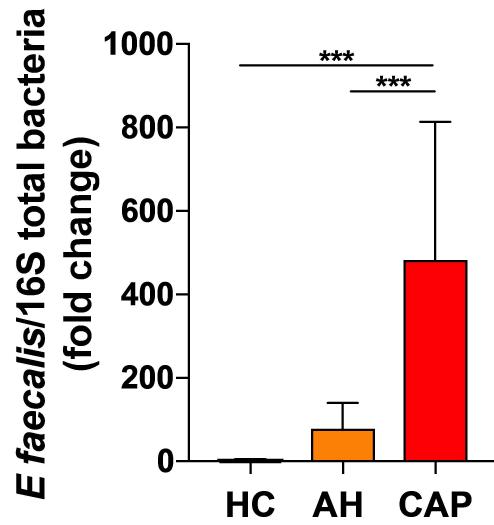**B**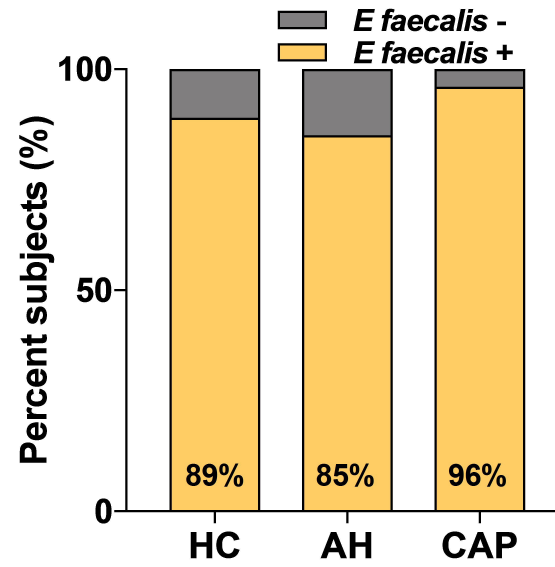**C**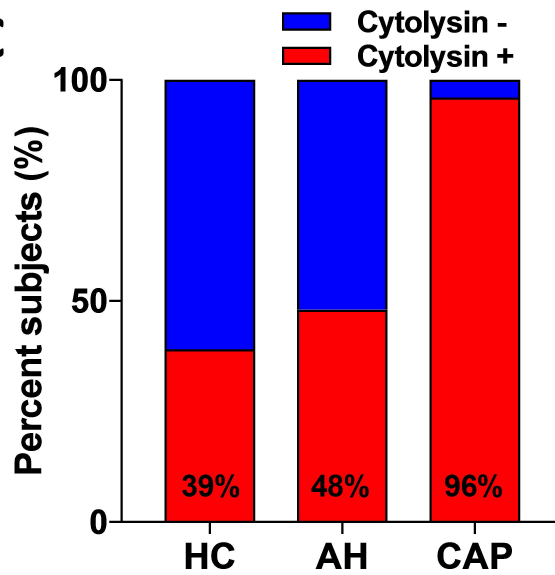**D**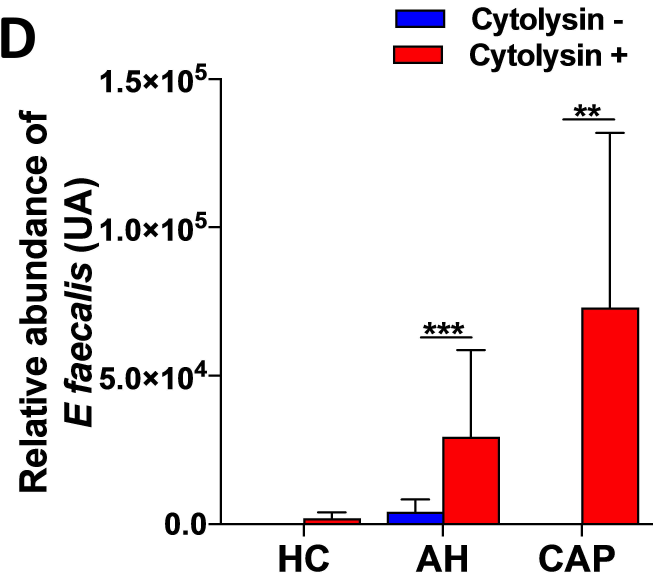

Source: https://biorxiv.org/content/10.1101/2021.11.30.468848v1.full.pdf
